# Supplementary material for: A Prognostic Risk Score Based on Hypoxia-, Immunity-, and Epithelialto-Mesenchymal Transition-Related Genes for the Prognosis and Immunotherapy Response of Lung Adenocarcinoma
Source: PubMed Central journal article supplement (PMC8819669; doi:10.3389/fcell.2021.758777), 2022-01-24
Supplement: Image1.pdf [file Image1.pdf]

## Supplementary Figure 1 | The analysis of independent prognostic risk factors

**A**

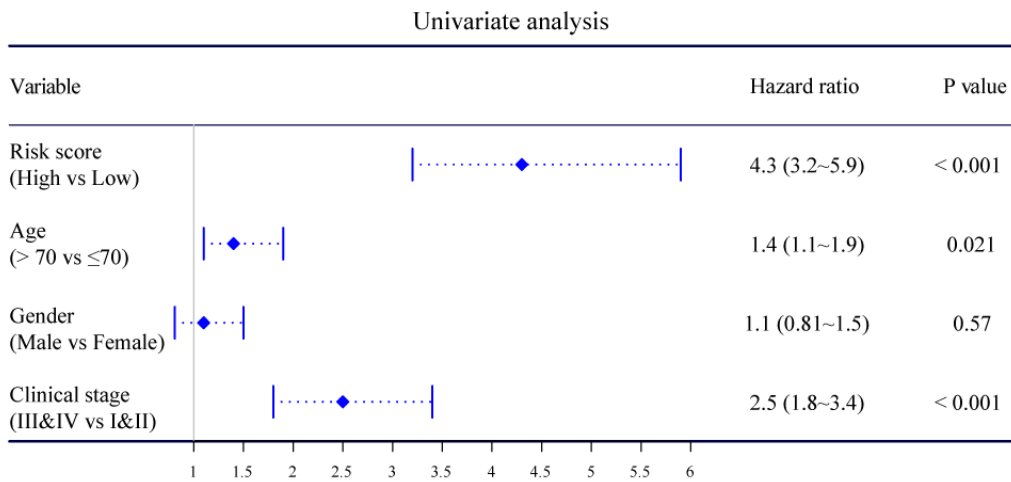

**B**

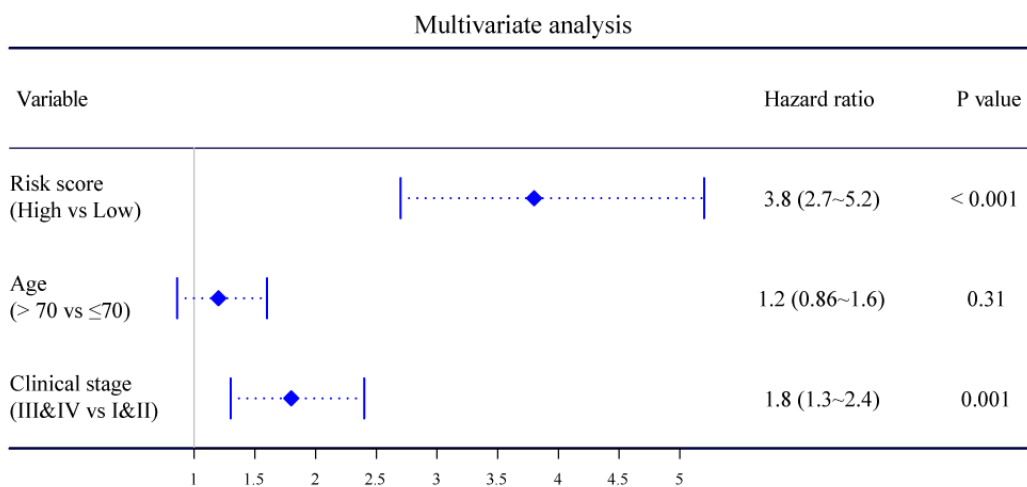

(A) Results of the univariate Cox regression analyses for OS in the TCGA cohort. (B) Results of the multivariate Cox regression analyses for OS in the TCGA cohort.
